## CORRESPONDENCE

Anesthesiology  
1996; 85:220  
© 1996 American Society of Anesthesiologists, Inc.  
Lippincott-Raven Publishers

## Difficult Airway Warning with Automated Anesthesia Recording

*To the Editor:*—It was most interesting and encouraging to read the letter to the editor by Atkins regarding a method of tracking patients with difficult or failed tracheal intubation.<sup>1</sup> With the cooperation of our private practice group, we also initiated a local registry for patients in whom difficult or failed tracheal intubation has occurred. Our staff anesthesiologists address the issue with the patient by verbal and/or written explanation postoperatively, and the patient is enrolled in our local database, where demographics, problems encountered, surgery, and outcome are listed.

Both a letter and wallet card are extremely important, but, in addition, a bracelet or necklace are recommended in the event of un-

anticipated surgery or trauma, when the patient may be unconscious or incoherent. We initiate the enrollment process into the Medic Alert Foundation and find the necessary funding to cover the costs of the bracelet for those patients who require financial assistance.

We integrated our automated anesthesia information system, CompuRecord® Anesthesia Information System (Anesthesia Recording, Pittsburgh, PA), into all aspects of our perioperative care during the past 6 yr. Currently, the system prompts the anesthesiologist to indicate whether tracheal intubation was easy or difficult. We are in the process of using this information to provide a warning message that will appear on the screen once the patient's medical record number has been entered, informing the anesthesia team of this potentially lethal condition (fig. 1). In the future, this system will provide warnings of other critical conditions, including histories of malignant hyperthermia, pseudocholinesterase deficiency, and drug allergies. It is our hope that the automated anesthesia information system, combined with the patient letter, local registry, and Medic Alert bracelet, will reduce the incidence of adverse sequelae for this challenging situation.

Roberta T. Pasqual, Ph.D.  
Christopher A. Troianos, M.D.  
Chester A. Phillips III, M.D.  
Department of Anesthesiology  
The Mercy Hospital of Pittsburgh  
1400 Locust Street  
Pittsburgh, Pennsylvania 15219

### Reference

1. Atkins RF: Simple method of tracking patients with difficult or failed intubation (letter). *ANESTHESIOLOGY* 1995; 83:1373-5

(Accepted for publication March 29, 1996.)

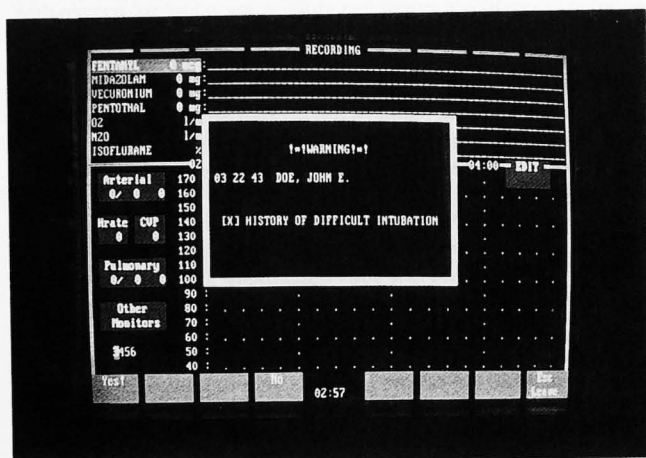

Fig. 1. Warning message on the screen of an automated anesthesia information system, indicating history of difficult intubation.

Anesthesiology  
1996; 85:220-1  
© 1996 American Society of Anesthesiologists, Inc.  
Lippincott-Raven Publishers

## A Simple Suction Device to Aid in Transportation of the Critically Ill Pediatric Patient

*To the Editor:*—We report a case of respiratory distress during patient transport that was treated by a simple, easily assembled suction device for endotracheal tubes. The patient was a 2-yr-old girl with a history of respiratory failure secondary to interstitial pulmonary in-

filtrates. The patient required tracheal intubation and mechanical ventilatory support in the intensive care unit. The patient was being transported to the operating room for open lung biopsy. In the elevator, the lungs became difficult to ventilate by self-inflating resus-

## CORRESPONDENCE

citator, breath sounds were distant, and oxygenation deteriorated by pulse oximetry. began to cough. The device was removed with the aid of a portable suction device at our institution (fig. 1). The device

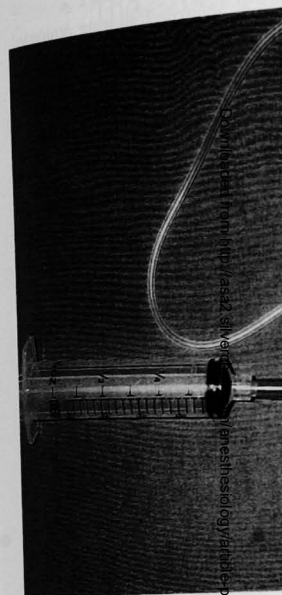

Fig. 1. Assembled portable suction device.

Anesthesiology  
1996; 85:221-2  
© 1996 American Society of Anesthesiologists, Inc.  
Lippincott-Raven Publishers

### New Endotracheal Tubes

*To the Editor:*—A recent article in the development of a new, thin-walled, flexible endotracheal tube (ETT) reminiscent of earlier ETT designs. This device to place and did not perform well. It shows promise because of its use of a highly flexible ETT molded to resemble an "anatomic" ETT in shape, being highly dependent on correct placement for functional improvement,<sup>3</sup> and, actually, individual patients could create a threat to their laryngo-tracheal junction. Of particular interest, Real-Flex ETTs have a "cuff" in the larynx. Laryngeal cord paralysis because of recurrent laryngeal nerve palsy and a soft ETT dislocation.<sup>4,5</sup> Laryngeal positioning
